# Supplementary material for: Mesoporous Ni0.3Co2.7O4hierarchical structures for effective non-enzymatic glucose detection
Source: Royal Society of Chemistry journal article supplement (doi:10.1039/c4ra02665a), 2014-01-01
Supplement: c4ra02665a1.pdf [file c4ra02665a1.pdf]

### ESI

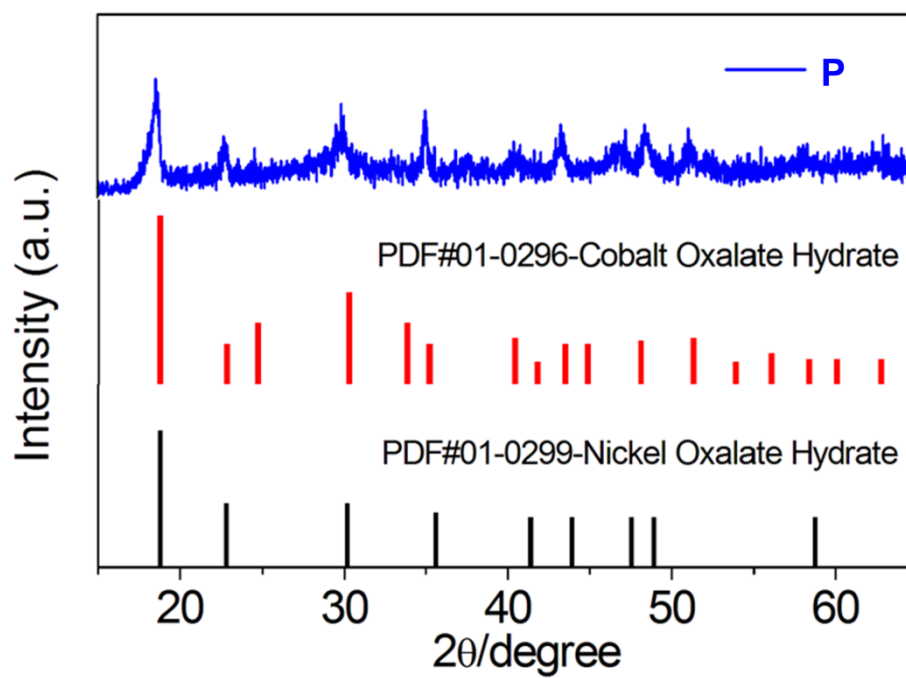

**Figure S1** XRD patterns of as-prepared precursor and JCPDS 01-0296 & 01-0299 for  $\text{CoC}_2\text{O}_4 \cdot 2\text{H}_2\text{O}$  &  $\text{NiC}_2\text{O}_4 \cdot 2\text{H}_2\text{O}$ .

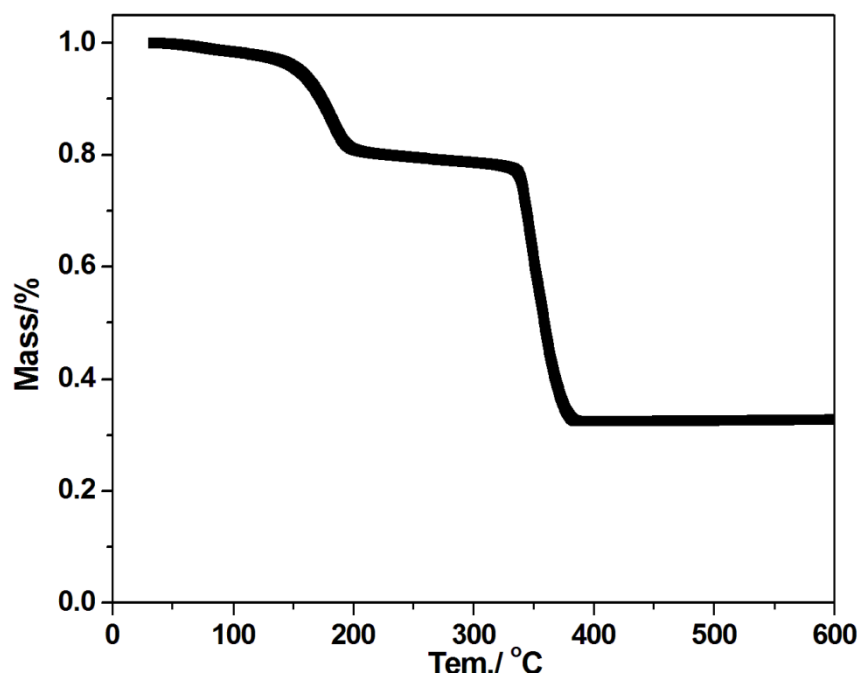

**Figure S2** TGA curve of the nickel cobalt oxalate precursor.

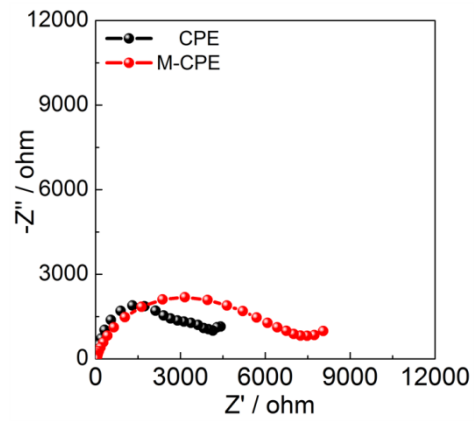

**Figure S3** The electrochemical impedance spectra (EIS) of the as-prepared M-CPE and CPE at room temperature is conducted at open circuit voltage in the frequency range of 100 kHz to 0.01 Hz with an AC voltage amplitude of 5 mV in  $5 \times 10^{-3} \text{ mol L}^{-1} [\text{Fe}(\text{CN})_6]^{4-/3-} + 0.1 \text{ mol L}^{-1} \text{ KCl} + 10 \times 10^{-3} \text{ mol L}^{-1} \text{ PBS}$  (pH = 7.2).

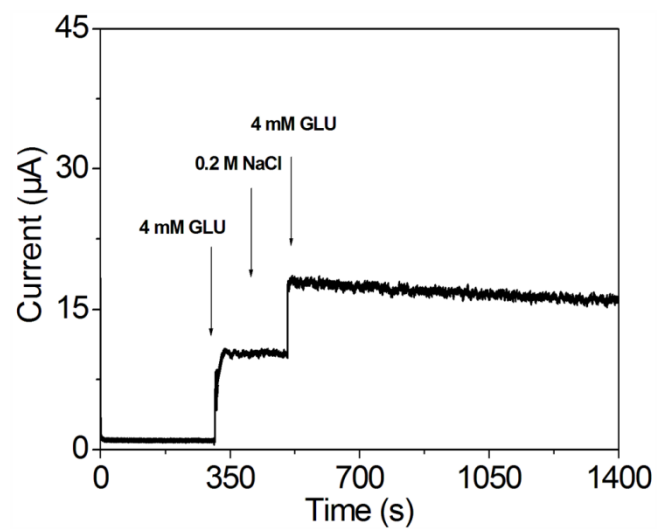

**Figure S4** Current-time curves for the M-CPE exposed to 4 mM glucose, 0.2 mM NaCl, and 4 mM glucose in 0.1 M NaOH solution.

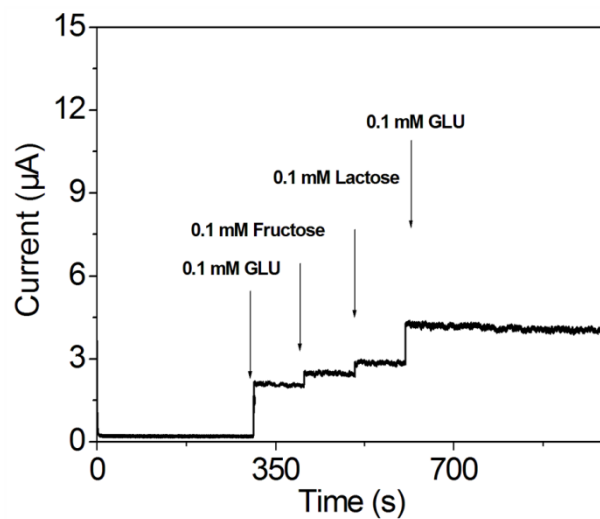

**Figure S5** Current-time curves for the M-CPE exposed to 0.1 mM glucose, 0.1 mM fructose, 0.1 mM lactose and 0.1 mM glucose in 0.1 M NaOH solution.
